# Supplementary material
Source: publisher figshare collection journal article supplement (https://tandf.figshare.com/ndownloader/files/14829116)
Supplement: Supplementary file 1 [file 14829116]

Sup Table 1 Comparation of characteristics of subjects in each group

|  | D-H  (n=3) | nonD-H  (n=3) | nonD-nonH (n=3) | *P* value |
| --- | --- | --- | --- | --- |
| Age (year) | 60.67±6.81 | 56.67±10.12 | 54.33±2.31 | 0.58 |
| BMI (kg/m2) | 24.14±2.79 | 25.96±3.17 | 23.02±2.20 | 0.47 |
| SBP (mmHg) | 144.33±16.01 | 144.00±5.29 | 124.83±8.61 | 0.12 |
| DBP (mmHg) | 76.67±5.29 | 84.50±6.95 | 80.00±9.53 | 0.48 |
| BDI (scores) | 20.67±1.53 | 2.00±2.00 | 0.67±1.15 | <0.001* |
| Exercise (n) |  |  |  | 0.37 |
| >60min/time | 0 | 0 | 0 |  |
| 30-60 min/time | 0 | 0 | 0 |  |
| ≤30 min/time | 2 | 2 | 3 |  |
| never | 0 | 1 | 0 |  |
| NA | 1 |  |  |  |
| Smoking (n) |  |  |  | 0.33 |
| Current | 0 | 0 | 0 |  |
| Previous | 0 | 0 | 1 |  |
| never | 3 | 3 | 2 |  |
| Drinking (n) |  |  |  | - |
| Current | 0 | 0 | 0 |  |
| Previous | 0 | 0 | 0 |  |
| never | 3 | 3 | 3 |  |
| Antihypertensive medicine |  |  |  |  |
| CCBs | 2 | 3 | 0 | 0.043 |
| β-receptor blockers | 3 | 2 | 0 | 0.043 |
| ARBs | 2 | 0 | 0 | 0.076 |
| Diuretics | 0 | 1 | 0 | 0.325 |

Note: BMI, body mass index; SBP, systolic blood pressure; DBP, diastolic blood pressure; BDI, Beck Depression Inventory; NA, not available; CCB, Calcium channel blocker; ARB, angiotensin receptor blocker (*P＜0.05).
